# Supplementary material for: Low-threshold laser medium utilizing semiconductor nanoshell quantum dots
Source: Royal Society of Chemistry journal article supplement (doi:10.1039/d0nr03582c), 2020-01-01
Supplement: d0nr03582c1.pdf [file d0nr03582c1.pdf]

**Supporting Information for:**

**Low-threshold Laser Medium Utilizing  
Semiconductor Nanoshell Quantum Dots.**

*Dmitry Porotnikov,<sup>1,2</sup> Benjamin T. Diroll,<sup>6</sup> Dulanjan Harankahage,<sup>1,2</sup> Laura Obloy,<sup>1,3</sup> Mingrui  
Yang,<sup>1,2</sup> James Cassidy,<sup>1,2</sup> Cole Ellison,<sup>1,2</sup> Emily Miller,<sup>1,2</sup> Spencer Rogers,<sup>5</sup> Alexander N.  
Tarnovsky,<sup>1,3</sup> Richard D. Schaller<sup>4,6</sup>, Mikhail Zamkov<sup>1,2</sup>*

The Center for Photochemical Sciences<sup>1</sup>, Department of Physics<sup>2</sup> and Department of  
Chemistry<sup>3</sup>, Bowling Green State University, Bowling Green, Ohio 43403. Department of  
Chemistry<sup>4</sup>, Northwestern University, Evanston, Illinois 60208. Department of Physics and  
Astronomy<sup>5</sup>, University of Rochester, Rochester, New York 14627. Center for Nanoscale  
Materials<sup>6</sup>, Argonne National Laboratory, Lemont, Illinois 60439.

Corresponding author: [zamkovm@bgsu.edu](mailto:zamkovm@bgsu.edu); Tel: 419-372-0264; Fax: 419-372-9938

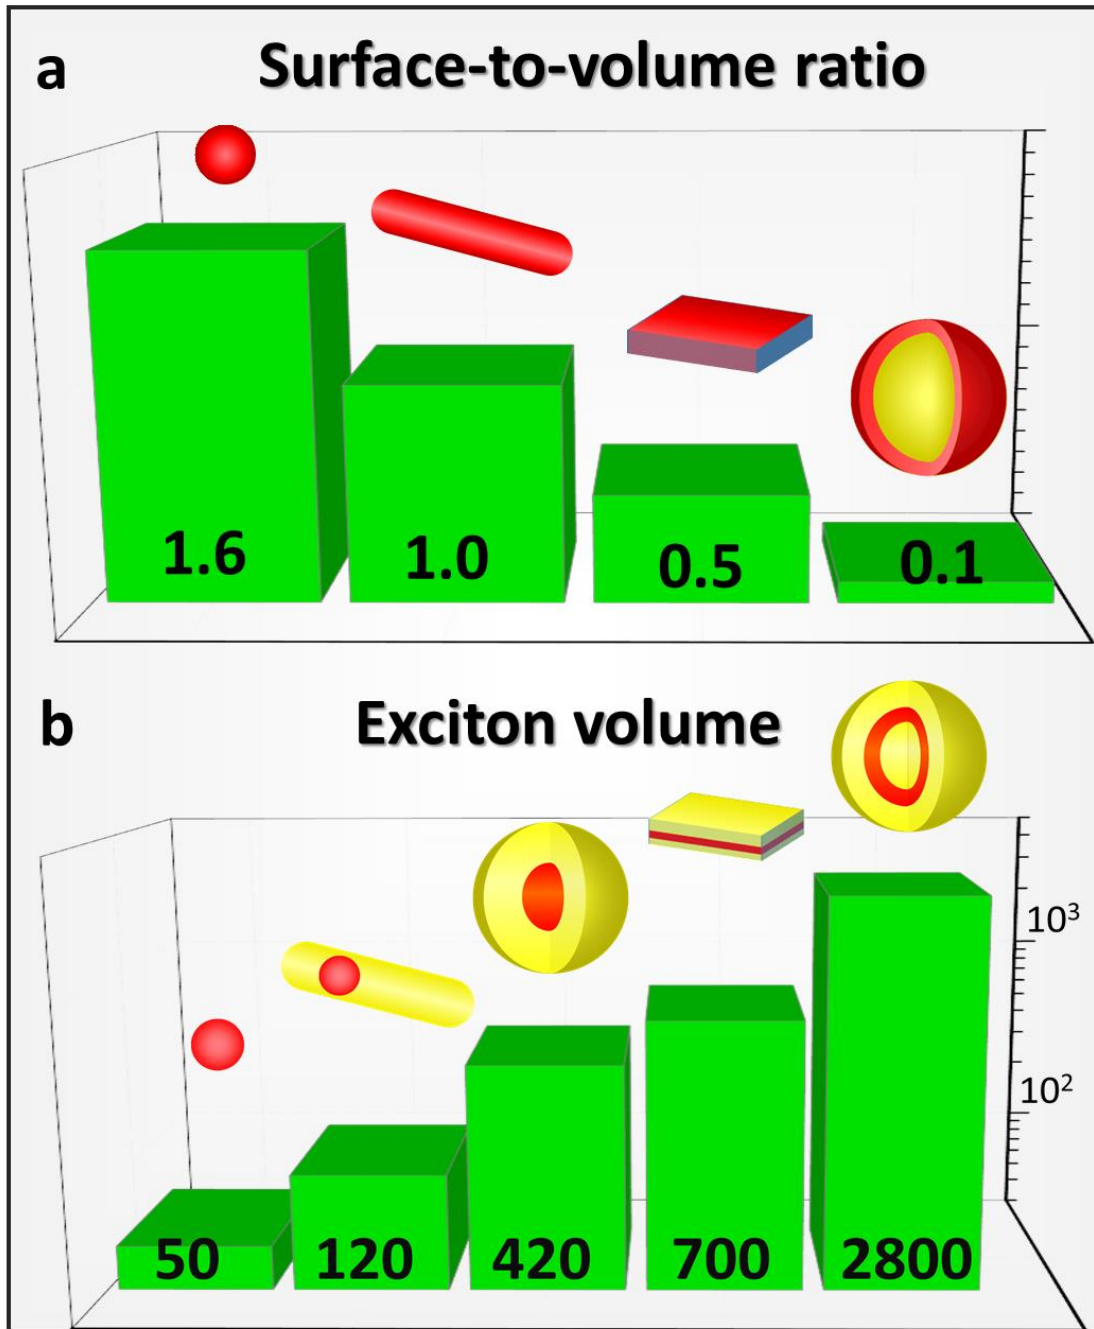

**Figure SF1.** (a). A comparison of the surface-to-volume ratios and (b) - exciton volumes corresponding to several quantum dot geometries. In (b) - from left to right: spherical CdSe quantum dots (diameter = 4 nm), CdSe/CdS dot-in-a-rod (dot diameter = 4 nm, rod length = 30 nm), CdSe/CdS core/shell (core radius = 2 nm, shell radius = 10 nm), CdSe/CdS nanosheets (20 nm × 20 nm × 2 nm), QW nanoshells, reported

here (CdSe shell radius = 6 nm, shell thickness = 2 nm, total radius = 10 nm). Part (b) was adapted with permission from the permission of Ref. 1. Copyright 2016 American Chemical Society.

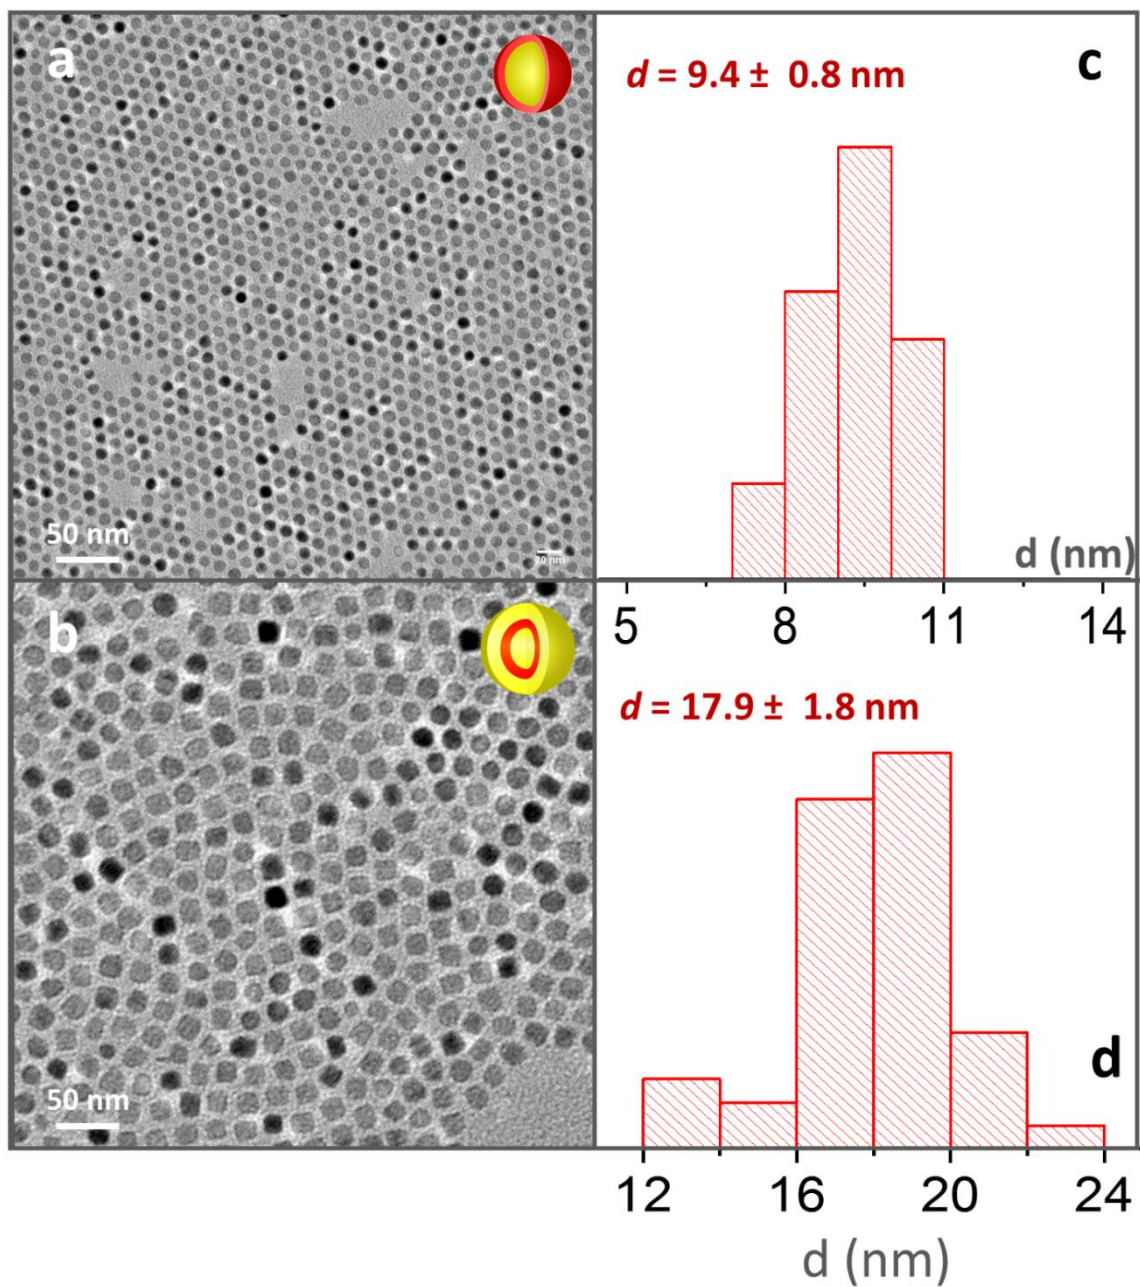

**Figure SF2.** Statistical analysis of particle size distributions corresponding to Fig. 3 (main text). (a,c). 9.4-nm CdS<sub>bulk</sub>/CdSe NCs used for seeding the growth of quantum-well nanoshells, CdS<sub>bulk</sub>/CdSe/CdS<sub>shell</sub>. (b,d). 17.9-nm CdS<sub>bulk</sub>/CdSe/CdS<sub>shell</sub> nanoshell QDs.

Sample 2: QY = 17%, ASE threshold  $140 \mu\text{J}/\text{cm}^2$

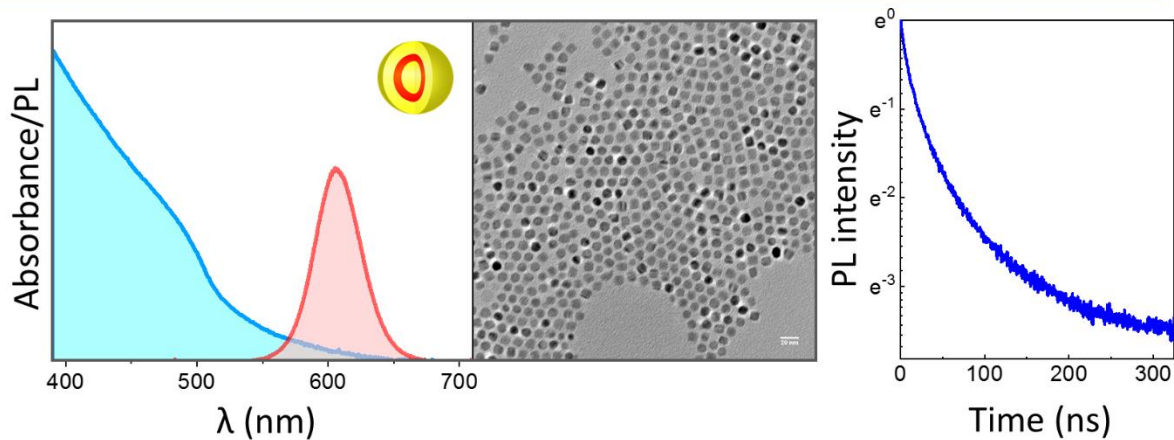

Sample 3: QY = 14%, ASE threshold  $133 \mu\text{J}/\text{cm}^2$

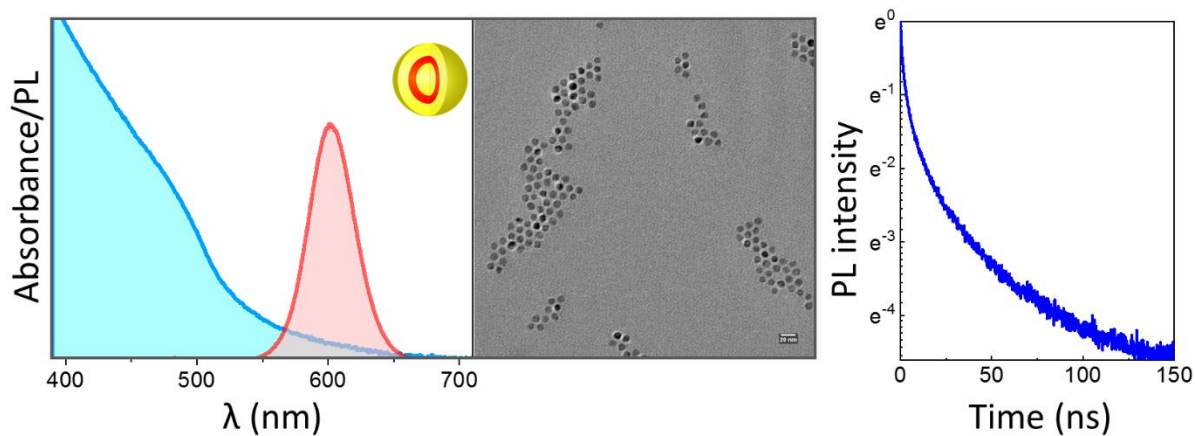

**Figure SF3.** The summary of optical and structural characteristics for  $\text{CdS}_{\text{bulk}}/\text{CdSe}/\text{CdS}_{\text{shell}}$  nanoshell QDs corresponding to other synthetic batches (PL QY = 11-17%), as discussed in the main text.

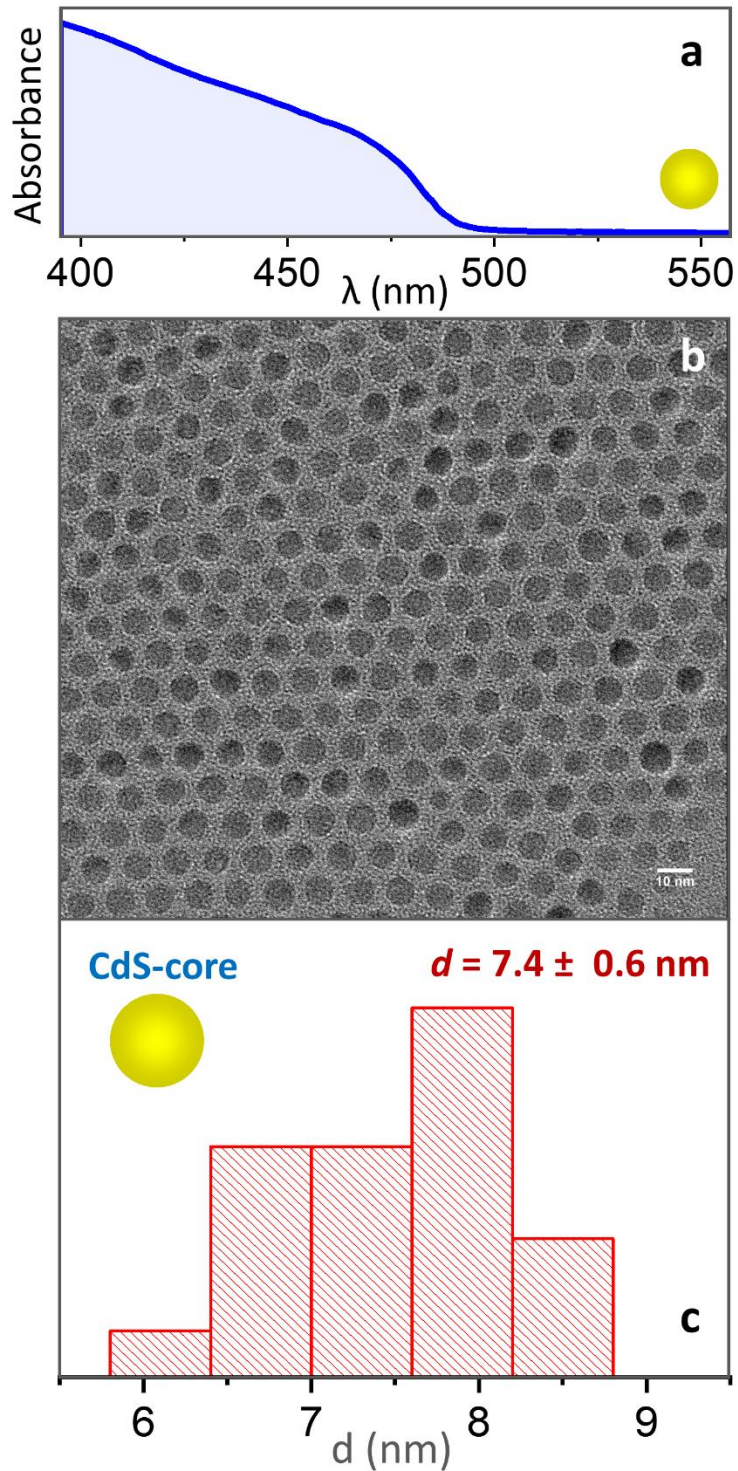

**Figure SF4.** (a). Absorption profile of the CdS<sub>bulk</sub> "core" NCs used for seeding the growth of CdS<sub>bulk</sub>/CdSe core/shell QDs. (b). A characteristic TEM image of CdS<sub>bulk</sub> "core" NCs. (c). Statistical analysis of particle size distributions for CdS<sub>bulk</sub> "core" NCs.

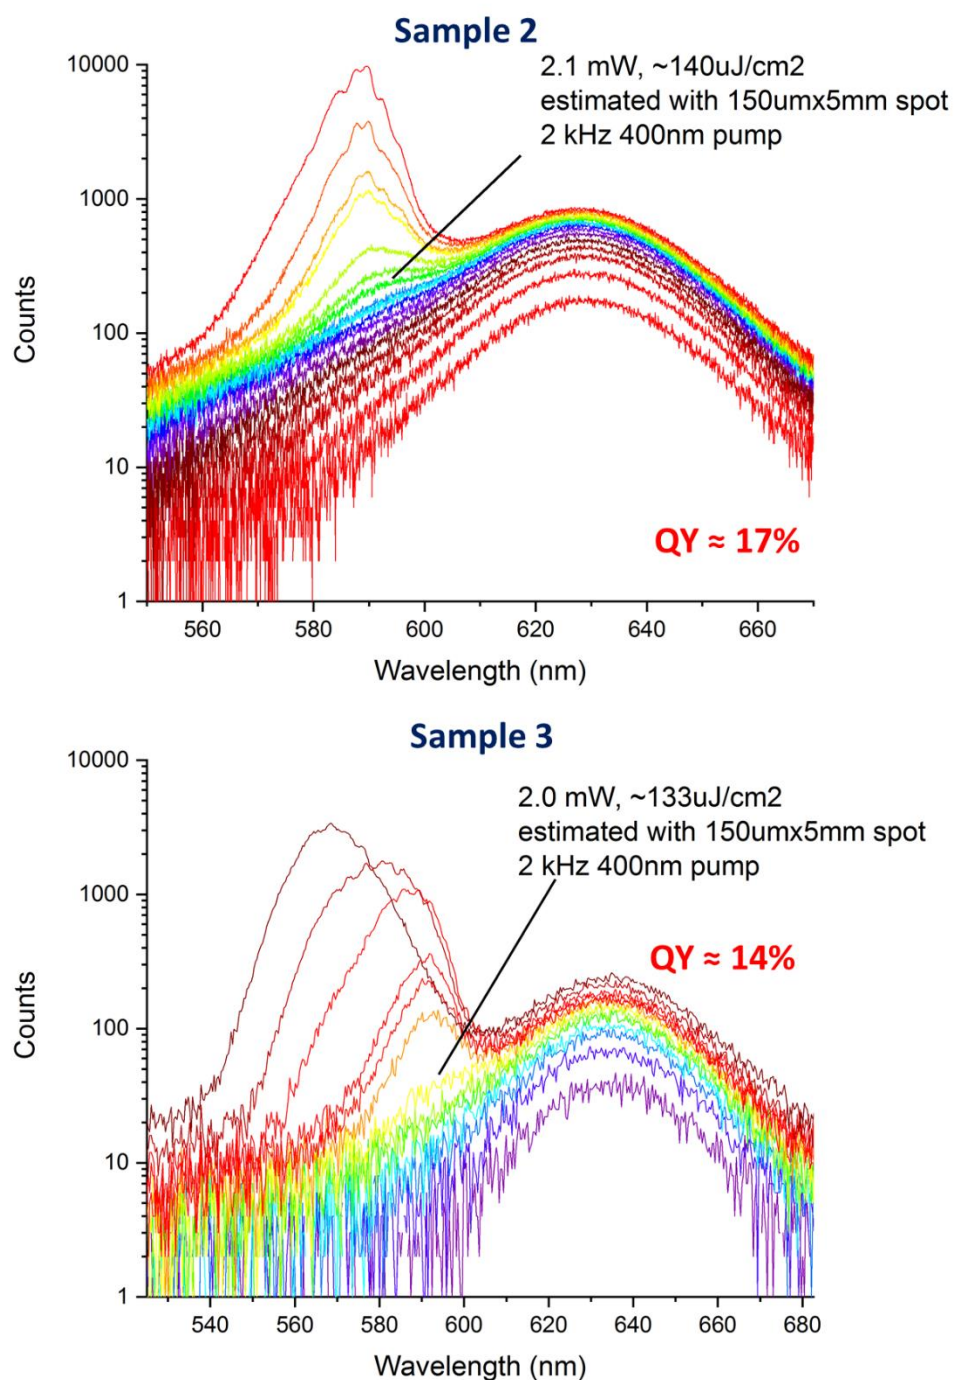

**Figure SF5.** Emission spectra versus different pump fluences observed for higher-threshold nanoshell QD samples 2 & 3 ( $\text{CdS}_{\text{bulk}}/\text{CdSe}/\text{CdS}_{\text{shell}}$ ). ASE thresholds were determined to be 140 and 133  $\mu\text{J}/\text{cm}^2$ , respectively. The inferior quality of these films was most likely the reason for higher thresholds as any light scattering or haziness of films diminished the ability to see ASE.

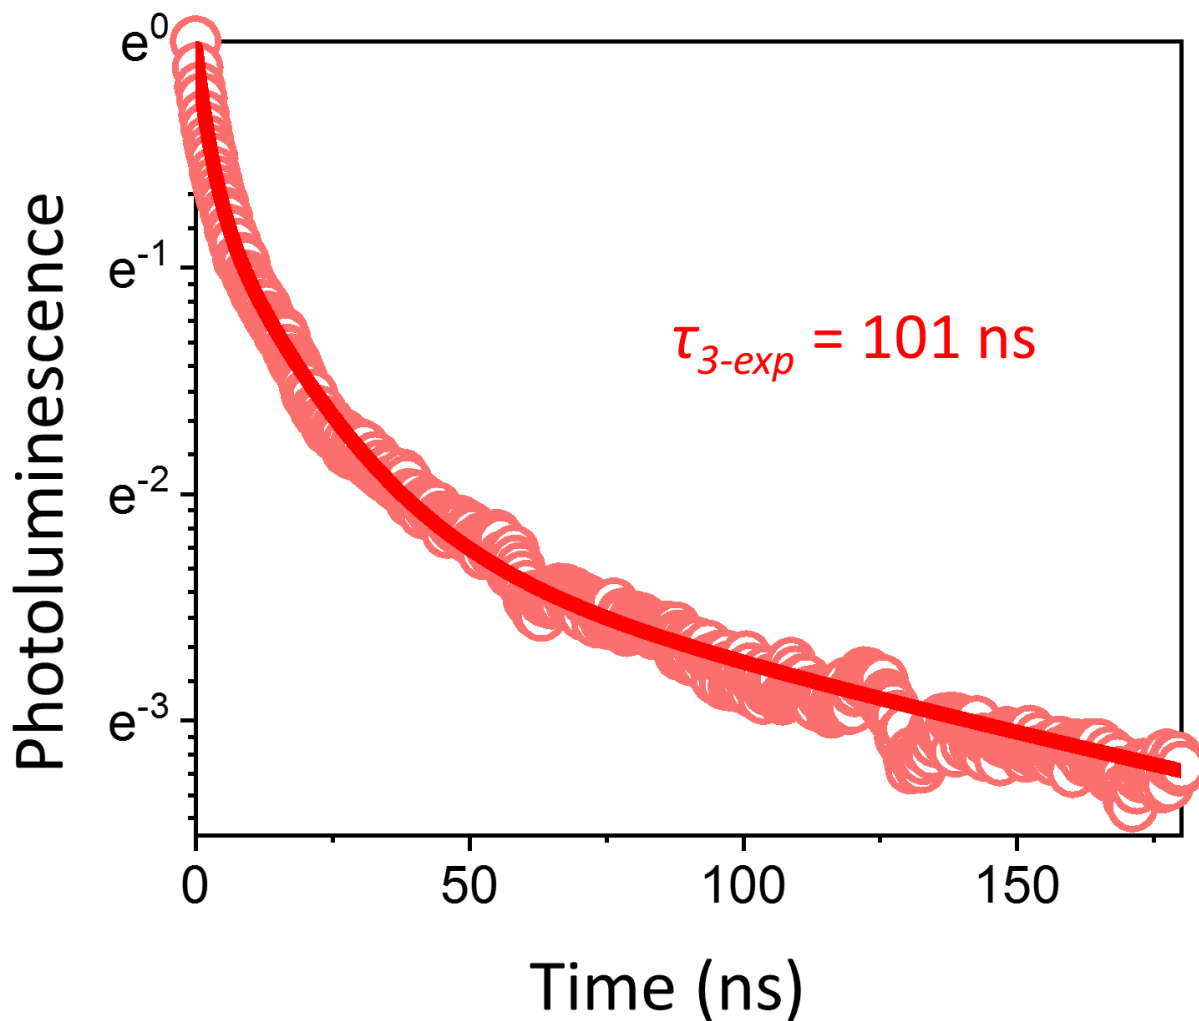

**Figure SF6.** PL intensity decay of 17.9-nm CdS<sub>bulky</sub>/CdSe/CdS<sub>shell</sub> nanoshell QDs. The PL lifetime was fitted using a triple exponential function to find average value using the following equation:  $\tau_{av} = \sum_{i=1}^3 A_i \tau_i / \sum_{i=1}^3 A_i$  where  $A_i$  and  $\tau_i$  represent the amplitude and the lifetime of each of the three exponents used in a triple exponential fit, respectively.

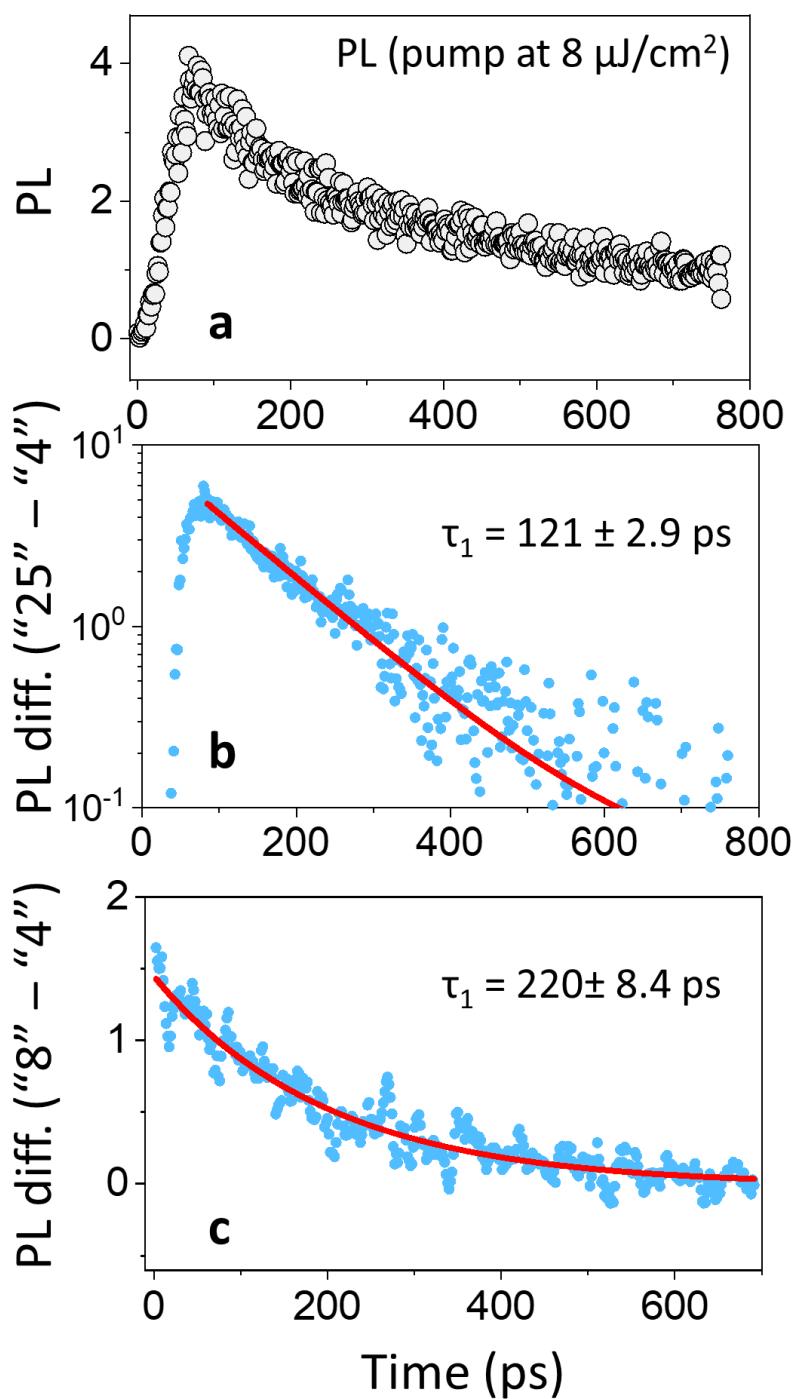

**Figure SF7.** (a). Time-resolved transient PL intensity for  $\text{CdS}_{\text{bulk}}/\text{CdSe}/\text{CdS}_{\text{shell}}$  QDs measured at the 8  $\mu\text{J}/\text{cm}^2$  pump excitation fluence. (b). The difference of PL spectra corresponding to 25  $\mu\text{J}/\text{cm}^2$  and 4  $\mu\text{J}/\text{cm}^2$  pump excitation fluences ("25" - "4"). The single exponential decay time constant is  $121.2 \pm 2.9$  ps. (c). The difference of PL spectra corresponding to 8  $\mu\text{J}/\text{cm}^2$  and 4  $\mu\text{J}/\text{cm}^2$  pump excitation fluences ("8" - "4"). The single exponential decay time constant is  $220 \pm 8$  ps.



## Determination of biexciton lifetimes from TA kinetics.

In order to extract biexciton lifetimes from the bleach recovery kinetics (Fig. 5d, main text), we have employed the coupled rate equation formalism,<sup>2</sup> which assumes: (i) - Poisson distribution of initial multi-exciton populations in a nanocrystal ensemble, and (ii) - statistical scaling of Auger lifetimes. Within this strategy, the average number of photons absorbed by a nanoparticle,  $\langle N \rangle$ , is first estimated from the known excitation pulse power, spectral density, and the sample absorption profile.<sup>3</sup> The average number of absorbed photons per particle is subsequently used to create the statistical distribution of nanoparticle fractions in the sample that receive  $n = 0, 1, 2 \dots$  excitons,  $P(n)$ . To this end, the probability of a nanocrystal absorbing  $n$  photons,  $f(n)$ , is assumed to follow the Poisson distribution:  $f(n) = \langle N \rangle^n \times e^{-\langle N \rangle} / n!$ . Under the assumption that multiple excitons in a given nanocrystal decay sequentially (*via* the Auger recombination), the temporal evolution of the  $n$ -exciton population in a particle,  $P(n, t)$ , can be determined by solving coupled rate equations:

$$\frac{dP(n, t)}{dt} = \frac{P(n+1, t)}{\tau_{n+1}} - \frac{P(n, t)}{\tau_n} \quad (\text{SE1})$$

where,  $\tau_n$  represents the lifetime of the  $n$ -exciton state. The resulting evolution of multi-exciton populations,  $P(n, t)$ , obtained by solving Eq. 1, depends on a single unknown parameter,  $\tau_2$ , corresponding to the Auger-limited biexciton lifetime. The single exciton lifetime,  $\tau_1$ , as well as multi-exciton lifetimes ( $\tau_n$ ;  $n > 2$ ) entering Eq. 1 can be determined *a priori*. To this end,  $\tau_1$  is either extracted from the long-time TA bleach recovery at low excitation powers or obtained from the PL intensity decay (Fig. SF7). The lifetimes of multi-exciton states,  $\tau_n$ , are computed using a statistical scaling law:  $\tau_n^{-1} = n^2(n-1)\tau_2^{-1}/4$ .<sup>4</sup> Owing to relatively low excitation powers used in present experiments ( $\langle N \rangle \sim 1$ ), we assume that the TA bleach,  $\Delta A$ , is contributed by up to four excitons, such that the average number of excitons per nanocrystal becomes,  $P(t) = 4 \times P(4, t) + 3 \times P(3, t) + 2 \times P(2, t) + P(1, t)$ . The resulting parametric curve,  $P(\tau_2, t)$ , was used to fit the experimental measured TA bleach,  $\Delta A(t)$ , in order to determine the best fitting parameter,  $\tau_2$ . We note that despite  $n = 2$  being highest exciton occupation number for zero-

dimensional CdSe NCs, due to a continuous electron density in CdS/CdSe nanoshells, these colloids are likely to support a larger number of band-edge excitons.

## References.

---

- <sup>1</sup> Kholmicheva, N.; Budkina, D. S.; Cassidy, J.; Porotnikov, D.; Harankahage, D.; Boddy, A.; Galindo, M.; Khon, D.; Tarnovsky, A. N.; Zamkov, M. Sustained Biexciton Populations in Nanoshell Quantum Dots. *ACS Photonics* **2019**, *6*, 1041-1050.
- <sup>2</sup> Klimov, V. I.; Mikhailovsky, A. A.; Xu, S.; Malko, A.; Hollingsworth, J. A.; Leatherdale, a. C.; Eisler, H.; Bawendi, M. G. Optical gain and stimulated emission in nanocrystal quantum dots. *Science* **2000**, *290*, 314-317.
- <sup>3</sup> Huang, J.; Huang, Z.; Yang, Y.; Zhu, H.; Lian, T. Multiple exciton dissociation in CdSe quantum dots by ultrafast electron transfer to adsorbed methylene blue. *J. Am. Chem. Soc.* **2010**, *132*, 4858-4864.
- <sup>4</sup> Klimov, V. I.; Mikhailovsky, A. A.; McBranch, D. W.; Leatherdale, C. A.; Bawendi, M. G. Quantization of multiparticle Auger rates in semiconductor quantum dots. *Science* **2000**, *287*, 1011-1013.
